# Supplementary material for: Chromonic nematic liquid crystals in a room-temperature ionic liquid
Source: Royal Society of Chemistry journal article supplement (doi:10.1039/d1cc05800b), 2022-01-01
Supplement: d1cc05800b1.pdf [file d1cc05800b1.pdf]

# Supplementary Information

1  
2  
3  
4  
5  
6  
7  
8  
9  
10  
11  
12  
13  
14  
15  
16  
17  
18  
19  
20  
21  
22  
23  
24  
25  
26  
27

## **Chromonic Nematic Liquid Crystals in a Room-Temperature Ionic Liquid**

J. R. Magana<sup>a</sup>, A. Pérez-Calm<sup>a,b</sup>, C. Rodriguez-Abreu<sup>a,b</sup>

<sup>a</sup> Institute for Advanced Chemistry of Catalonia (IQAC), Spanish National Research Council (CSIC), Jordi Girona 18-26 08034, Barcelona, Spain.

<sup>b</sup> Networking Research Center on Bioengineering, Biomaterials and Nanomedicine (CIBER-BBN), Jordi Girona 18-26 08034, Barcelona, Spain.

## 28 Experimental

### 29 CHEMICALS

30 Commercially available perylenetetracarboxylic dianhydride >98% (PTCDA, TCI Europe),  
31 hydroxyethylammonium formate (HEAF, Iolitec), ethyl ammonium nitrate (EAN, Iolitec) and 1-ethyl-  
32 3-methylimidazolium acetate (EMIAc, Iolitec), Tetraethyl-orthosilicate (TEOS, Sigma Aldrich) were  
33 used without further purification. Ultrapure water (resistivity = 18 MΩ/cm) was used in all  
34 experiments. Dyes and chromonic mesogens used in the experiments were obtained from different  
35 manufacturers (see Table SI1) at the highest purity available and used without further purification.

### 36 SYNTHESIS

37 Bis ( N',N' - diethyl - N' - methyl – 2 - ammoniumethyl) perylene – 3 , 4 , 9 , -10 - tetracarboxylic  
38 diimide dichloride (PDI), was synthesized according to the literature.<sup>[1]</sup>

### 39 UV-VIS SPECTROSCOPY

40 UV-vis spectra were collected in a Shimadzu UV-2550 and a Perkin Elmer Lambda 365 using a quartz  
41 cuvette with a path length of 2 mm. The absorbance,  $A$ , was converted into the molar absorption  
42 coefficient,  $\epsilon$ , using:

$$43 \quad A = \epsilon cl$$

44 Where  $c$  and  $l$  are the dye concentration and cuvette path length, respectively. The PDI spectra in  
45 HEAF and water was modeled assuming an isodesmic aggregation similar to previous publications  
46 by using the following equation:<sup>[2]</sup>

$$47 \quad \epsilon(\lambda, C_o) = (\epsilon_M(\lambda) - \epsilon_D(\lambda)) \frac{\sqrt{(8K_D C_o + 1)} - 1}{4K_D}$$

48 Where  $\epsilon_M$  and  $\epsilon_D$  are the molar absorption coefficient of the monomer and dimer, respectively,  $K_D$   
49 is the dimerization constant, and  $C_o$  is the total molar concentration of PDI in solution. The values  
50 for  $K_D$  were averaged from different wavelengths and different concentrations. The Gibbs free  
51 energy,  $\Delta G$ , was calculated as:

$$52 \quad \Delta G = \frac{k_B T * \ln(K_D)}{N_a}$$

53 Where  $T$ ,  $k_B$  and  $N_a$  are the absolute temperature, the Boltzmann constant, and the Avogadro  
54 number, respectively.

55  $K_D$ , calculated as a function of temperature, was used to estimate the activation energy,  $E_a$ ,  
56 according to Arrhenius theory:

$$57 \quad \ln(K_D) = -\frac{E_a}{k_B T} + \text{intercept}$$

58

59

## 60 FLUORESCENCE SPECTROSCOPY

61 Samples were measured in 2mm quartz cuvettes in a Horiba Scientific Fluoromax-4 and an Agilent  
62 Cary Eclipse. The conditions were identical for all the measurements and the data is as obtained  
63 without any normalization.

## 64 SAMPLE PREPARATION AT HIGH PDI CONCENTRATIONS.

65 PDI/HEAF viscous samples (above 25 wt% PDI) were prepared by repeatedly passing the mixture  
66 through a narrow constriction in flame sealed glass tubes using a centrifuge.

## 67 SMALL ANGLE X-RAY SCATTERING

68 All experiments were performed on an Anton Paar SAXSess MC<sup>2</sup> system. The scattering intensity  
69 was measured as a function of the scattering vector,  $q$ :

$$70 \quad q = \frac{4\pi * \sin(\theta)}{\lambda}$$

71 where  $\theta$  is the scattering angle and  $\lambda$  is the radiation wavelength (1.54 Å).

72 Liquid crystalline PDI samples were placed in flame-sealed glass capillaries. The intercolumnar  
73 distance,  $d$ , in the nematic phase was estimated using Bragg law as:

$$74 \quad d = \frac{2\pi}{q_{max}}$$

75 Where  $q_{max}$  is the  $q$  value at the peak maxima. The cross-sectional area of the aggregates,  $A_c$ , can be  
76 estimated by approximating the nematic phase to a loose hexagonal packing as:<sup>[3]</sup>

$$77 \quad A_c = \frac{2d^2\phi_f}{\sqrt{3}}$$

78 Where  $\phi_f$  is the volume fraction (estimated using the density of mesogen in the solid state).

## 79 POLARIZED OPTICAL MICROSCOPY

80 Polarized optical microscopy (POM) observations were made on a Nikon SMZ-1500 microscope.  
81 Temperature-dependent POM was performed on an Olympus BX51TRF6 microscope coupled to a  
82 Peltier hot stage with a precision of  $\pm 1$  °C.

## 83 SCANNING ELECTRON MICROSCOPY

84 SEM micrographs of the silica samples were collected using a Hitachi TM4000Plus II operating 5 kV  
85 with secondary electrons. Samples were prepared by drop-casting ethanol dispersions on a silicon  
86 wafer.

## 87 NITROGEN ADSORPTION-DESORPTION

88 Nitrogen adsorption and desorption studies were performed on an Autosorb-1 Quantachrome  
89 Instrument.

91 Table SI1. Dyes, chromonic mesogens and ILs used in POM contact experiments. Manufacturers are  
 92 indicated between brackets next to the mesogen's name. Last column displays the occurrence of  
 93 such mesogens in water and their concentration range (if known) at 20 °C

| Chromonic mesogen           | Molecular structure                                                                 | HEAF<br>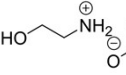 | EMIAC<br> | EAN<br> | LCLC formation in water [wt% range] |
|-----------------------------|-------------------------------------------------------------------------------------|--------------------------------------------------------------------------------------------|----------------------------------------------------------------------------------------------|--------------------------------------------------------------------------------------------|-------------------------------------|
| Acid Red 27 (TCI)           |    | No LC                                                                                      | Not tested                                                                                   | Not tested                                                                                 | [0.5 wt% – 10 wt%] <sup>[4]</sup>   |
| Congo Red (TCI)             |   | No LC                                                                                      | Not tested                                                                                   | Not tested                                                                                 | LC <sup>[5,6]</sup>                 |
| Neutral Red (Sigma-Aldrich) |  | No LC                                                                                      | No LC                                                                                        | Not tested                                                                                 | LC(unpublished results)             |
| Acid Black 1 (TCI)          |  | No LC                                                                                      | Not tested                                                                                   | Not tested                                                                                 | No LC                               |

|                                                                                         |                                                                                     |       |            |            |                          |
|-----------------------------------------------------------------------------------------|-------------------------------------------------------------------------------------|-------|------------|------------|--------------------------|
| <p>Alcian Blue tetrakis (methylpyridinium) chloride aka Alcian Blue (Sigma-Aldrich)</p> | 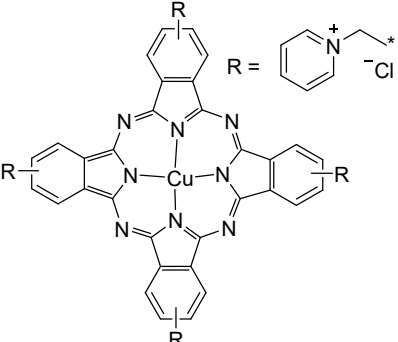   | No LC | No LC      | Not tested | LC (unpublished results) |
| <p>1,1'-Diethyl-3,3,3',3'-tetramethylindocarbocyanine Iodide (TCI)</p>                  |    | No LC | Not tested | Not tested | Not tested               |
| <p>3,3,3',3'-Tetramethyl-1,1'-bis(4-sulfobutyl) indocarbocyanine (TCI)</p>              |   | No LC | Not tested | Not tested | No LC                    |
| <p>AzBTS (TCI)</p>                                                                      |  | No LC | Not tested | Not tested | No LC                    |
| <p>Nickel(II) phthalocyanine-tetrasulfonic acid tetrasodium salt (Sigma-Aldrich)</p>    |  | No LC | Not tested | Not tested | LC <sup>[7]</sup>        |

|                                                                                                |                                                                                     |       |            |            |                                  |
|------------------------------------------------------------------------------------------------|-------------------------------------------------------------------------------------|-------|------------|------------|----------------------------------|
| <p>Copper phthalocyanine-3,4',4'',4'''-tetrasulfonic acid tetrasodium salt (Sigma-Aldrich)</p> | 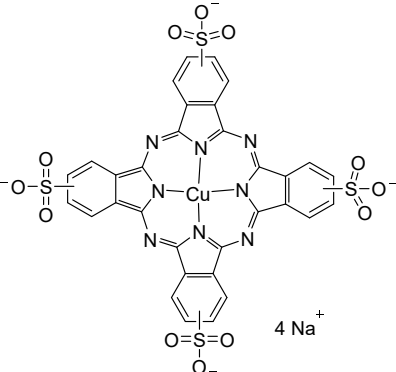   | No LC | Not tested | Not tested | LC <sup>[7]</sup>                |
| <p>Cromolyn (Alfa Aesar)</p>                                                                   |    | No LC | No LC      | Not tested | [5 wt% - 40 wt%] <sup>[8]</sup>  |
| <p>Sunset Yellow (Sigma-Aldrich)</p>                                                           |   | No LC | Not tested | Not tested | [25 wt% - 45 wt%] <sup>[9]</sup> |
| <p>Pyronin Y (Sigma-Aldrich)</p>                                                               |  | No LC | No LC      | No LC      | [40 wt% - 75wt %] <sup>[3]</sup> |
| <p>Quinaldine Red Iodide (Sigma-Aldrich)</p>                                                   |  | No LC | No LC      | Not tested | No LC                            |
| <p>Quinaldine Red Acetate (Synthesized)</p>                                                    |  | No LC | No LC      | Not tested | [35 wt% - 70 wt%] <sup>[3]</sup> |

|                                                   |                                                                                     |                 |            |            |                                  |
|---------------------------------------------------|-------------------------------------------------------------------------------------|-----------------|------------|------------|----------------------------------|
| Pinacyanol Acetate (Synthesized)                  | 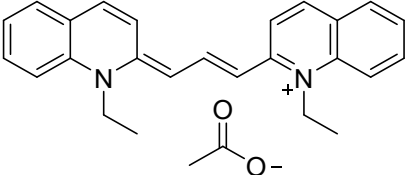   | LC (metastable) | No LC      | No LC      | [<1 wt% -10 wt%] <sup>[10]</sup> |
| Pinacyanol Chloride (Sigma-Aldrich)               |    | LC (metastable) | Not tested | Not tested | No LC                            |
| Gallocyanine (Sigma-Aldrich)                      |    | No LC           | No LC      | Not tested | No LC                            |
| Perylene diimide chloride (PDI) (Synthesized)     |    | LC (stable)     | No LC      | No LC      | [5 wt% - 20 wt%] <sup>[11]</sup> |
| Diethyl (thiacarbocyanine) acetate (Synthesized)  |   | LC              | Not tested | Not tested | LC <sup>[2]</sup>                |
| Diethyl (thiacarbocyanine) iodide (TCI)           |  | No LC           | Not tested | Not tested | No LC                            |
| Dipropyl (thiacarbocyanine) acetate (Synthesized) |  | LC              | Not tested | Not tested | LC <sup>[2]</sup>                |
| Dipropyl (thiacarbocyanine) iodide (TCI)          |  | No LC           | Not tested | Not tested | No LC                            |

|                                                            |                                                                                   |       |               |               |                   |
|------------------------------------------------------------|-----------------------------------------------------------------------------------|-------|---------------|---------------|-------------------|
| Dibutyl<br>(thiacarbocyanin<br>e) acetate<br>(Synthesized) | 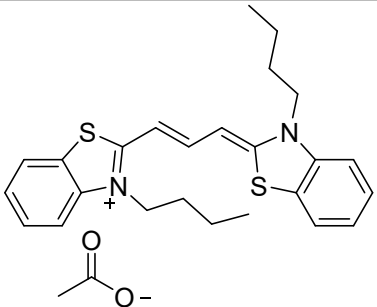 | LC    | Not<br>tested | Not<br>tested | LC <sup>[2]</sup> |
| Dibutyl<br>(thiacarbocyanin<br>e) iodide (TCI)             |  | No LC | Not<br>tested | Not<br>tested | No LC             |

94

95

96

97

Table S12. Thermodynamic parameters calculated from the UV-vis spectra.

| Sample       | $K_D$ ( $M^{-1}$ )                  | $-\Delta G$ (kJ/mol) | $E_a$ (kJ/mol) |
|--------------|-------------------------------------|----------------------|----------------|
| PDI in HEAF  | $5.2 \cdot 10^3 \pm 1.3 \cdot 10^3$ | 21.2                 | 12.2           |
| PDI in water | $1.4 \cdot 10^5 \pm 8.0 \cdot 10^4$ | 29.4                 | 7.7            |

98

99

100

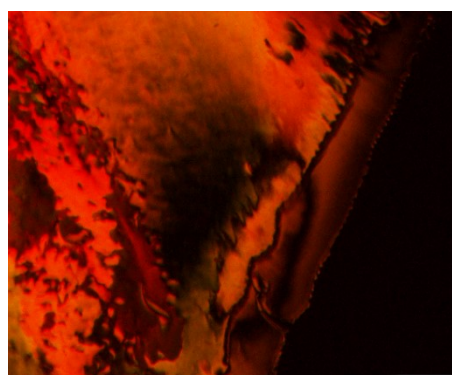

101

HEAF content

102 Figure S11. Representative POM micrograph at room temperature (25°C) of the contact interface  
103 between PDI and HEAF.



104

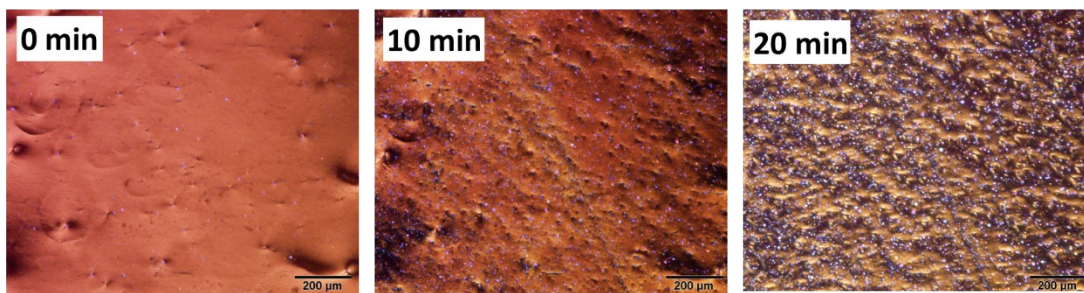

105

106 Figure S12. POM micrographs at room temperature (25°C) of a 3 wt% Pinacyanol acetate in HEAF  
107 displaying the crystallization over time of a nematic mesophase. The scale bar is 200 μm

108

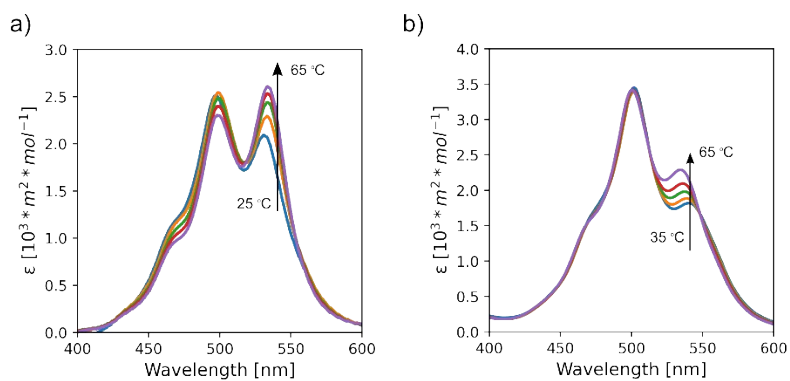

109

110 Figure S13. Temperature-dependent UV-Vis spectra of a 100 μM PDI solution in a) HEAF and b) water.

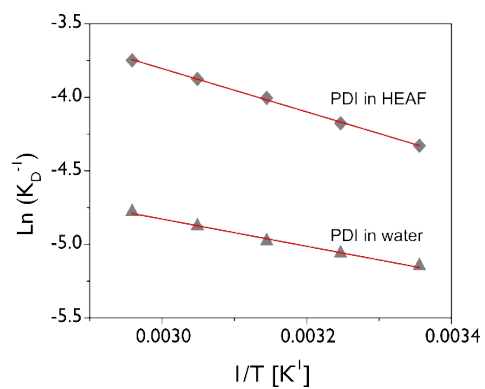

111

112 Figure S14. Arrhenius plot showing the natural logarithm of the dimerization constant vs the inverse  
113 temperature of a 100 μM PDI sample in HEAF and water.

114

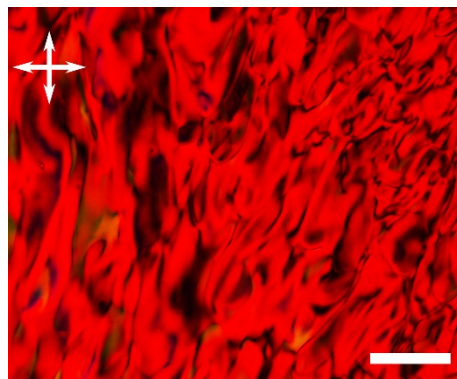

115

116 Figure SI5. POM micrograph of a 30 wt% PDI sample in HEAF at room temperature showing a  
 117 characteristic Schlieren texture (scale bar = 100  $\mu\text{m}$ ).

118

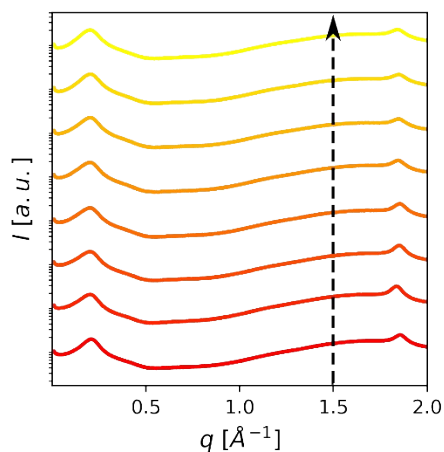

119

120 Figure SI6. Temperature-dependent SWAXS patterns of a 30 wt% PDI sample in HEAF heated from  
 121 25 °C to 95 °C in 10 °C steps; the arrow indicates increasing temperature.

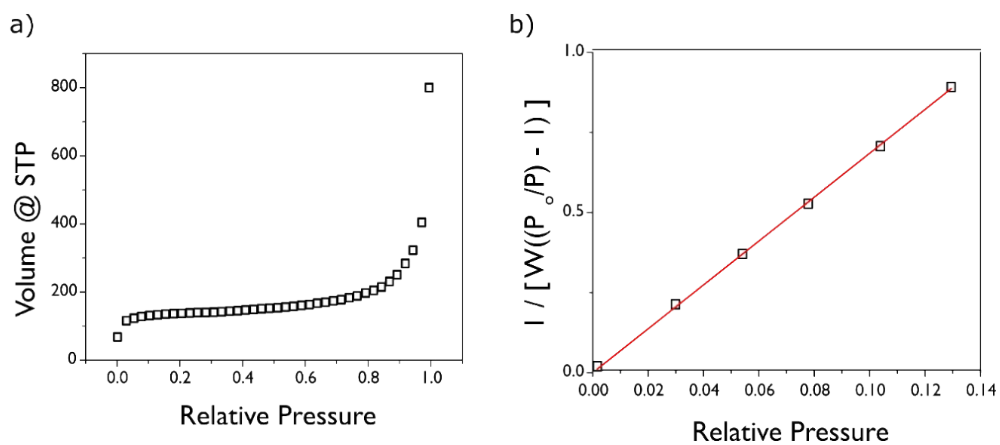

122

123 Figure SI7. a) Nitrogen adsorption isotherm of the calcined silica material and b) the corresponding  
 124 fit for the Brunauer-Emmer-Teller (BET) theory.

125

126

127 **References**

- 128 [1] S. W. Tam-Chang, J. Helbley, I. K. Iverson, *Langmuir* **2008**, *24*, 2133–2139.
- 129 [2] J. R. Magana, C. Solans, L. M. Salonen, E. Carbó-Argibay, J. Gallo, G. J. T. Tiddy, C. Rodríguez-  
130 Abreu, *J. Taiwan Inst. Chem. Eng.* **2018**, *92*, 134–142.
- 131 [3] J. R. Magana, M. Homs, C. Solans, M. Obiols-Rabasa, L. M. Salonen, C. Rodríguez-Abreu, *J.*  
132 *Phys. Chem. B* **2016**, *120*, 250–258.
- 133 [4] A. Alfutimie, A. P. Ormerod, J. W. Jones, H. Wheatcroft, D. J. Edwards, G. J. T. Tiddy,  
134 <http://dx.doi.org/10.1080/02678292.2015.1024770> **2015**, *42*, 1169–1178.
- 135 [5] M. R. Kuzma, V. Skarda, M. M. Labes, *J. Chem. Phys.* **1998**, *81*, 2925.
- 136 [6] M. Skowronek, B. Stopa, L. Konieczny, J. Rybarska, B. Piekarska, E. Szneler, G. Bakalarski, I.  
137 Roterman, *Biopolymers* **1998**, *46*, 267–281.
- 138 [7] Carlos Rodríguez-Abreu, Y. V. Kolen'ko, Kirill Kovnir, Margarita Sanchez-Dominguez, R.  
139 Goswami Shrestha, Partha Bairi, Katsuhiko Ariga, L. Kumar Shrestha, *Phys. Chem. Chem.*  
140 *Phys.* **2020**, *22*, 23276–23285.
- 141 [8] N. H. Hartshorne, G. D. Woodard, <https://doi.org/10.1080/15421407308083381> **2007**, *23*,  
142 343–368.
- 143 [9] D. J. Edwards, J. W. Jones, O. Lozman, A. P. Ormerod, M. Sinyureva, G. J. T. Tiddy, *J. Phys.*  
144 *Chem. B* **2008**, *112*, 14628–14636.
- 145 [10] C. Rodríguez-Abreu, C. A. Torres, G. J. T. Tiddy, *Langmuir* **2011**, *27*, 3067–3073.
- 146 [11] S. W. Tam-Chang, I. K. Iverson, J. Helbley, *Langmuir* **2003**, *20*, 342–347.

147
